# Supplementary material for: Tumor Immune Microenvironment and Its Clinicopathological and Prognostic Associations in Canine Splenic Hemangiosarcoma
Source: MDPI journal article supplement (doi:10.3390/ani14081224), 2024-04-18
Supplement: s1 [file s1]

**Supplementary Table S1.** Signalment and follow-up data of the animals included in the study.

| Dog N. | Breed               | Gender | Age  | Stage* | Metastasis | Outcome      | Overall survival (days) |
|--------|---------------------|--------|------|--------|------------|--------------|-------------------------|
| 1      | Labrador retriever  | F      | 10   | n.a.   | N          | Unfavourable | 229                     |
| 2      | German shepherd     | F      | 13   | I      | N          | Favourable   | 723                     |
| 3      | German shepherd     | M      | 10   | II     | N          | Unfavourable | 21                      |
| 4      | German shepherd     | M      | 11   | n.a.   | n.a.       | n.a.         | n.a.                    |
| 5      | Belgian shepherd    | M      | 8    | n.a.   | n.a.       | n.a.         | n.a.                    |
| 6      | Springer spaniel    | M      | 8    | n.a.   | n.a.       | n.a.         | n.a.                    |
| 7      | n.a.                | M      | 12   | II     | Y          | Unfavourable | 46                      |
| 8      | n.a.                | M      | 9    | II     | n.a.       | Favourable   | 971                     |
| 9      | Australian Shepherd | M      | 9    | n.a.   | n.a.       | n.a.         | n.a.                    |
| 10     | Mixed breed         | M      | 9    | n.a.   | n.a.       | n.a.         | n.a.                    |
| 11     | Labrador retriever  | F      | 12   | n.a.   | n.a.       | n.a.         | n.a.                    |
| 12     | Cane Corso          | M      | 10   | n.a.   | n.a.       | n.a.         | n.a.                    |
| 13     | Boxer               | F      | 8    | II     | N          | Unfavourable | n.a.                    |
| 14     | Mixed breed         | M      | 13   | III    | Y          | Unfavourable | 113                     |
| 15     | German shepherd     | FS     | 10   | II     | N          | Unfavourable | n.a.                    |
| 16     | Pomeranian          | M      | n.a. | n.a.   | n.a.       | Unfavourable | n.a.                    |
| 17     | Australian Shepherd | F      | n.a. | n.a.   | n.a.       | n.a.         | n.a.                    |
| 18     | Mixed breed         | M      | 9    | III    | Y          | Unfavourable | 91                      |
| 19     | Ariegeois           | FS     | 10   | II     | Y          | Unfavourable | 145                     |
| 20     | Labrador retriever  | M      | n.a. | n.a.   | n.a.       | n.a.         | n.a.                    |
| 21     | n.a.                | F      | 12   | II     | N          | Favourable   | 611                     |
| 22     | Mixed breed         | M      | 16   | III    | Y          | Unfavourable | 164                     |
| 23     | Epagneul Breton     | F      | 10   | II     | Y          | Unfavourable | 509                     |
| 24     | Golden retriever    | FS     | 12   | III    | Y          | Unfavourable | 28                      |
| 25     | Mixed breed         | M      | 12   | III    | Y          | Unfavourable | 27                      |
| 26     | Jack russel terrier | F      | n.a. | II     | Y          | Unfavourable | 395                     |
| 27     | Jack russel terrier | M      | 14   | n.a.   | n.a.       | n.a.         | n.a.                    |
| 28     | Mixed breed         | F      | 13   | II     | Y          | Unfavourable | 72                      |

|    |                                |      |    |      |      |              |      |
|----|--------------------------------|------|----|------|------|--------------|------|
| 29 | Mixed breed                    | F    | 12 | I    | Y    | Unfavourable | 137  |
| 30 | Labrador retriever             | M    | 4  | II   | n.a. | Favourable   | 452  |
| 31 | Mixed breed                    | M    | 10 | II   | n.a. | Unfavourable | 52   |
| 32 | Beagle                         | M    | 11 | II   | Y    | Unfavourable | 245  |
| 33 | Mixed breed                    | FS   | 8  | n.a. | n.a. | Favourable   | 362  |
| 34 | German shepherd                | n.a. | 10 | III  | Y    | Unfavourable | 44   |
| 35 | Labrador retriever             | F    | 11 | III  | Y    | Unfavourable | 106  |
| 36 | Mixed breed                    | M    | 13 | I    | Y    | Unfavourable | 97   |
| 37 | American staffordshire terrier | MC   | 9  | II   |      | Unfavourable | n.a. |
| 38 | Mixed breed                    | F    | 10 | III  | Y    | Unfavourable | 109  |
| 39 | Mixed breed                    | FS   | 12 | III  | Y    | Unfavourable | 67   |
| 40 | Labrador retriever             | M    | 10 | n.a. | n.a. | n.a.         | n.a. |
| 41 | Labrador retriever             | M    | 9  | n.a. | Y    | Unfavourable | 37   |
| 42 | Mixed breed                    | M    | 13 | I    | Y    | Unfavourable | 230  |
| 43 | French Bouledogue              | M    | 6  | I    | N    | Unfavourable | 535  |
| 44 | Poodle                         | FS   | 12 | II   | n.a. | Unfavourable | n.a. |
| 45 | Labrador retriever             | MC   | 10 | II   | Y    | Unfavourable | 10   |
| 46 | Cocker Spaniel                 | M    | 11 | II   | Y    | Unfavourable | 199  |
| 47 | Vizla                          | M    | 11 | I    | N    | Unfavourable | 9    |
| 48 | Boxer                          | MC   | 12 | III  | Y    | Unfavourable | 311  |
| 49 | Jack russel terrier            | M    | 11 | I    | N    | Favourable   | 485  |
| 50 | Boxer                          | M    | 8  | III  | Y    | Unfavourable | 183  |
| 51 | German shepherd                | FS   | 13 | II   | Y    | Unfavourable | 296  |
| 52 | Mixed breed                    | FS   | 14 | III  | Y    | Unfavourable | 128  |
| 53 | German shepherd                | M    | 12 | n.a. | N    | Unfavourable | n.a. |
| 54 | Mixed breed                    | FS   | 12 | II   | Y    | Unfavourable | 102  |
| 55 | Mixed breed                    | M    | 7  | II   | Y    | Unfavourable | n.a. |
| 56 | Mixed breed                    | M    | 14 | II   | n.a. | Favourable   | 81   |

\*Staging system according to Withrow et al [4]. n.a.= not available

**Supplementary Table S2.** Immunohistochemical data of the animals included in the study.

| Dog N. | Iba-1        |          | FoxP3        |          | CTLA-4       |          | CD3          |          |        | CD20         |          |        |
|--------|--------------|----------|--------------|----------|--------------|----------|--------------|----------|--------|--------------|----------|--------|
|        | Distribution | Quantity | Distribution | Quantity | Distribution | Quantity | Distribution | Quantity | Groups | Distribution | Quantity | Groups |
| 1      | 2            | 5.6      | 1            | 1        | 0            | 0        | 2            | 4.5      | 0      | 2            | 4.6      | 0      |
| 2      | 0            | 0        | 0            | 0        | 0            | 0        | 2            | 10.8     | 0      | 1            | 6.8      | 0      |
| 3      | 3            | 42.4     | 2            | 2.9      | 2            | 0.2      | 1            | 13.4     | 0      | 1            | 3.2      | 0      |
| 4      | 2            | 10       | 2            | 2.8      | 0            | 0        | 2            | 24.2     | 2      | 2            | 40.2     | 0      |
| 5      | 1            | 0.4      | 0            | 0        | 2            | 0.4      | 1            | 5        | 0      | 0            | 2.7      | 0      |
| 6      | 2            | 10.4     | 2            | 12.5     | 0            | 0        | 2            | 66.1     | 2      | 2            | 51.4     | 2      |
| 7      | 3            | 65       | 2            | 3.7      | 2            | 0.5      | 3            | 48.9     | 2      | 3            | 37.8     | 2      |
| 8      | 3            | 55.8     | 0            | 0        | 2            | 0.5      | 2            | 24.3     | 0      | 0            | 1        | 0      |
| 9      | 2            | 13.1     | 2            | 2.2      | 2            | 1.2      | 2            | 6.9      | 0      | 0            | 2        | 0      |
| 10     | 1            | 3        | 2            | 3.4      | 0            | 0        | 3            | 19.6     | 0      | 1            | 2.8      | 0      |
| 11     | 3            | 81       | 2            | 1.2      | 0            | 0        | 2            | 37.4     | 0      | 2            | 34.1     | 1      |
| 12     | 2            | 5.6      | 2            | 7.4      | 2            | 2.7      | 3            | 39.8     | 2      | 2            | 20.3     | 1      |
| 13     | 2            | 29.4     | 2            | 5.5      | 0            | 0        | 3            | 62       | 2      | 1            | 7.4      | 1      |
| 14     | 0            | 0        | 2            | 2.4      | 2            | 3.1      | 3            | 42.8     | 0      | 2            | 20.7     | 1      |
| 15     | 2            | 2.9      | 1            | 0.2      | 1            | 0.2      | 2            | 3.8      | 0      | 0            | 0.6      | 0      |
| 16     | 3            | 42.6     | 2            | 7.3      | 3            | 4.5      | 3            | 93.5     | 0      | 2            | 44.4     | 2      |
| 17     | 2            | 11       | 2            | 5.3      | 2            | 3.8      | 1            | 16.8     | 0      | 1            | 8.5      | 0      |
| 18     | 0            | 0        | 2            | 0.4      | 2            | 0.8      | 2            | 45.1     | 0      | 1            | 23.6     | 0      |
| 19     | 1            | 3.4      | 2            | 1.4      | 2            | 0.2      | 3            | 18.2     | 0      | 0            | 1.7      | 0      |
| 20     | 2            | 2.6      | 2            | 2.7      | 1            | 0.2      | 3            | 97.5     | 2      | 2            | 25.6     | 1      |
| 21     | 2            | 55.1     | 2            | 3        | 0            | 0        | 2            | 33.8     | 0      | 1            | 4.6      | 0      |
| 22     | 2            | 6        | 2            | 4.2      | 2            | 3.3      | 3            | 96.8     | 2      | 2            | 42.2     | 1      |
| 23     | 0            | 0        | 0            | 0        | 0            | 0        | 1            | 8.4      | 0      | 2            | 32.5     | 0      |
| 24     | 0            | 0        | 2            | 2.9      | 0            | 0        | 2            | 11.2     | 0      | 2            | 7.7      | 0      |
| 25     | 3            | 35.8     | 2            | 0.5      | 0            | 0        | 2            | 15.2     | 0      | 0            | 0.6      | 0      |
| 26     | 2            | 5.1      | 2            | 1.8      | 0            | 0        | 2            | 16.5     | 0      | 2            | 17.2     | 0      |

|    |   |       |   |      |   |     |   |      |   |   |      |   |
|----|---|-------|---|------|---|-----|---|------|---|---|------|---|
| 27 | 3 | 11.2  | 2 | 0.7  | 0 | 0   | 1 | 4.8  | 0 | 0 | 3.1  | 0 |
| 28 | 2 | 3.3   | 2 | 6.9  | 2 | 1   | 2 | 53.2 | 2 | 1 | 4    | 0 |
| 29 | 2 | 3.8   | 2 | 3    | 0 | 0   | 1 | 11.6 | 0 | 0 | 0.4  | 0 |
| 30 | 3 | 119.2 | 2 | 8.3  | 2 | 2.4 | 2 | 54.4 | 2 | 3 | 45.4 | 1 |
| 31 | 2 | 14.3  | 2 | 4.5  | 2 | 1.2 | 2 | 62.9 | 2 | 2 | 49.3 | 2 |
| 32 | 2 | 19.2  | 2 | 3.1  | 2 | 1   | 1 | 19.4 | 0 | 0 | 0.4  | 0 |
| 33 | 2 | 17.2  | 2 | 8.9  | 2 | 1.1 | 3 | 14.1 | 0 | 2 | 19   | 1 |
| 34 | 1 | 6     | 2 | 23.9 | 1 | 0.2 | 3 | 89.4 | 0 | 0 | 1.2  | 0 |
| 35 | 3 | 48.6  | 2 | 1.7  | 2 | 2.2 | 3 | 38.5 | 1 | 3 | 11.2 | 0 |
| 36 | 2 | 22.7  | 2 | 6.9  | 2 | 1.2 | 2 | 4.5  | 0 | 2 | 29.7 | 2 |
| 37 | 1 | 5     | 2 | 1.9  | 1 | 0.2 | 3 | 78   | 2 | 0 | 1.4  | 0 |
| 38 | 3 | 60.3  | 2 | 10   | 1 | 0.6 | 3 | 98.5 | 2 | 1 | 25.7 | 2 |
| 39 | 2 | 20.7  | 2 | 0.8  | 0 | 0   | 3 | 39.2 | 0 | 2 | 34.8 | 1 |
| 40 | 2 | 31.2  | 2 | 1.4  | 0 | 0   | 2 | 16.8 | 0 | 0 | 1.2  | 0 |
| 41 | 0 | 0     | 2 | 2    | 0 | 0   | 3 | n.a. |   | 3 | 73.6 | 2 |
| 42 | 2 | 2.4   | 1 | 1    | 0 | 0   | 2 | 48.5 | 2 | 1 | 0.2  | 0 |
| 43 | 3 | 143.8 | 1 | 1    | 3 | 4   | 2 | 76.3 | 2 | 2 | 76.4 | 2 |
| 44 | 2 | 6.4   | 2 | 1.3  | 0 | 0   | 1 | 6    | 1 | 2 | 21.9 | 1 |
| 45 | 2 | 37.2  | 1 | 0.2  | 1 | 0.2 | 1 | 39.1 | 1 | 2 | 6    | 0 |
| 46 | 3 | 35.2  | 2 | 5.3  | 3 | 4.2 | 2 | 6.5  | 0 | 2 | 21.5 | 2 |
| 47 | 2 | 13.5  | 1 | 0.8  | 0 | 0   | 3 | 56.6 | 0 | 1 | 4.7  | 0 |
| 48 | 3 | 43.6  | 1 | 2.2  | 2 | 1   | 3 | 30.7 | 2 | 2 | 42.7 | 0 |
| 49 | 2 | 8.9   | 3 | 17.8 | 3 | 5.1 | 2 | 30.7 | 1 | 2 | 5.3  | 0 |
| 50 | 2 | 23.6  | 2 | 1.9  | 2 | 0.4 | 2 | 14.4 | 1 | 1 | 9    | 1 |
| 51 | 2 | 2.4   | 3 | 8.8  | 2 | 3.2 | 3 | 62.7 | 2 | 2 | 56.2 | 2 |
| 52 | 2 | 20.6  | 2 | 2.4  | 3 | 4.9 | 1 | 55.4 | 2 | 1 | 21.8 | 2 |
| 53 | 2 | 3.5   | 1 | 0.4  | 2 | 1   | 2 | 6.9  | 0 | 2 | 2.9  | 0 |
| 54 | 2 | 1.8   | 2 | 3.3  | 2 | 3.8 | 2 | 7    | 0 | 1 | 0.8  | 0 |
| 55 | 3 | 62.9  | 1 | 0.8  | 2 | 1.1 | 1 | 13.1 | 1 | 2 | 69.4 | 2 |
| 56 | 2 | 10.3  | 1 | 1.2  | 2 | 1.1 | 1 | 49   | 2 | 2 | 0.6  | 0 |

Distribution: 0 = absent, 1 = focal, 2 = multifocal, 3 = diffuse.

Quantity: average number of positive cells per unit area (0.237 mm<sup>2</sup>).

Groups: 0 = single cells, 1 = small aggregates, 2 = massive aggregates ( $\geq 30$  cells).

n.a.= not available
